# Supplementary material for: Versatile wastewater monitoring of pathogens and antimicrobial resistance enabled by metatranscriptomics and long-read metagenomics
Source: Research Square preprint supplement (doi:10.21203/rs.3.rs-7492978/v1), 2025-09-10
Supplement: Supplementary file 1 [file 021ea4f50c9181c4ad193de9.docx]

##### Supplemental Tables

| **Group 1** | **Group 2** | **Sample size** | **Permutations** | **pseudo-F** | **p-value** | **q-value** |
| --- | --- | --- | --- | --- | --- | --- |
| **College Campus: Non-Residential** | College Campus: Residential | 282 | 999 | 15.91 | 0.001 | 0.001 |
| **College Campus: Non-Residential** | WWTP: Encina | 201 | 999 | 62.57 | 0.001 | 0.001 |
| **College Campus: Non-Residential** | WWTP: Point Loma | 275 | 999 | 110.02 | 0.001 | 0.001 |
| **College Campus: Residential** | WWTP: Encina | 293 | 999 | 74.70 | 0.001 | 0.001 |
| **College Campus: Residential** | WWTP: Point Loma | 367 | 999 | 133.55 | 0.001 | 0.001 |
| **WWTP: Encina** | WWTP: Point Loma | 286 | 999 | 41.79 | 0.001 | 0.001 |

Supplementary Table 1

PERMANOVA Group comparisons for unweighted unifrac distances between samples grouped by wastewater source. Near-source samples included Campus residential and non-residential sources. Wastewater treatment plant sources included the Encina and Point Loma plants.

| **Group 1** | **Group 2** | **Sample size** | **pseudo-F** | **p-value** |
| --- | --- | --- | --- | --- |
| **College Campus: Non-Residential** | College Campus: Residential | 282 | 17765 | 7.47E-43 |
| **College Campus: Non-Residential** | WWTP: Encina | 201 | 10070 | 2.20E-34 |
| **College Campus: Non-Residential** | WWTP: Point Loma | 275 | 17100 | 2.56E-42 |
| **College Campus: Residential** | WWTP: Encina | 293 | 19822 | 6.76E-46 |
| **College Campus: Residential** | WWTP: Point Loma | 367 | 33660 | 1.26E-61 |
| **WWTP: Encina** | WWTP: Point Loma | 286 | 0 | 2.79E-45 |

Supplementary Table 2

Mann Whitney U Test comparisons for convex hull volumes calculated per wastewater source with a leave-one-out strategy. Near-source samples included Campus residential and non-residential sources. Wastewater treatment plant sources included the Encina and Point Loma plants.


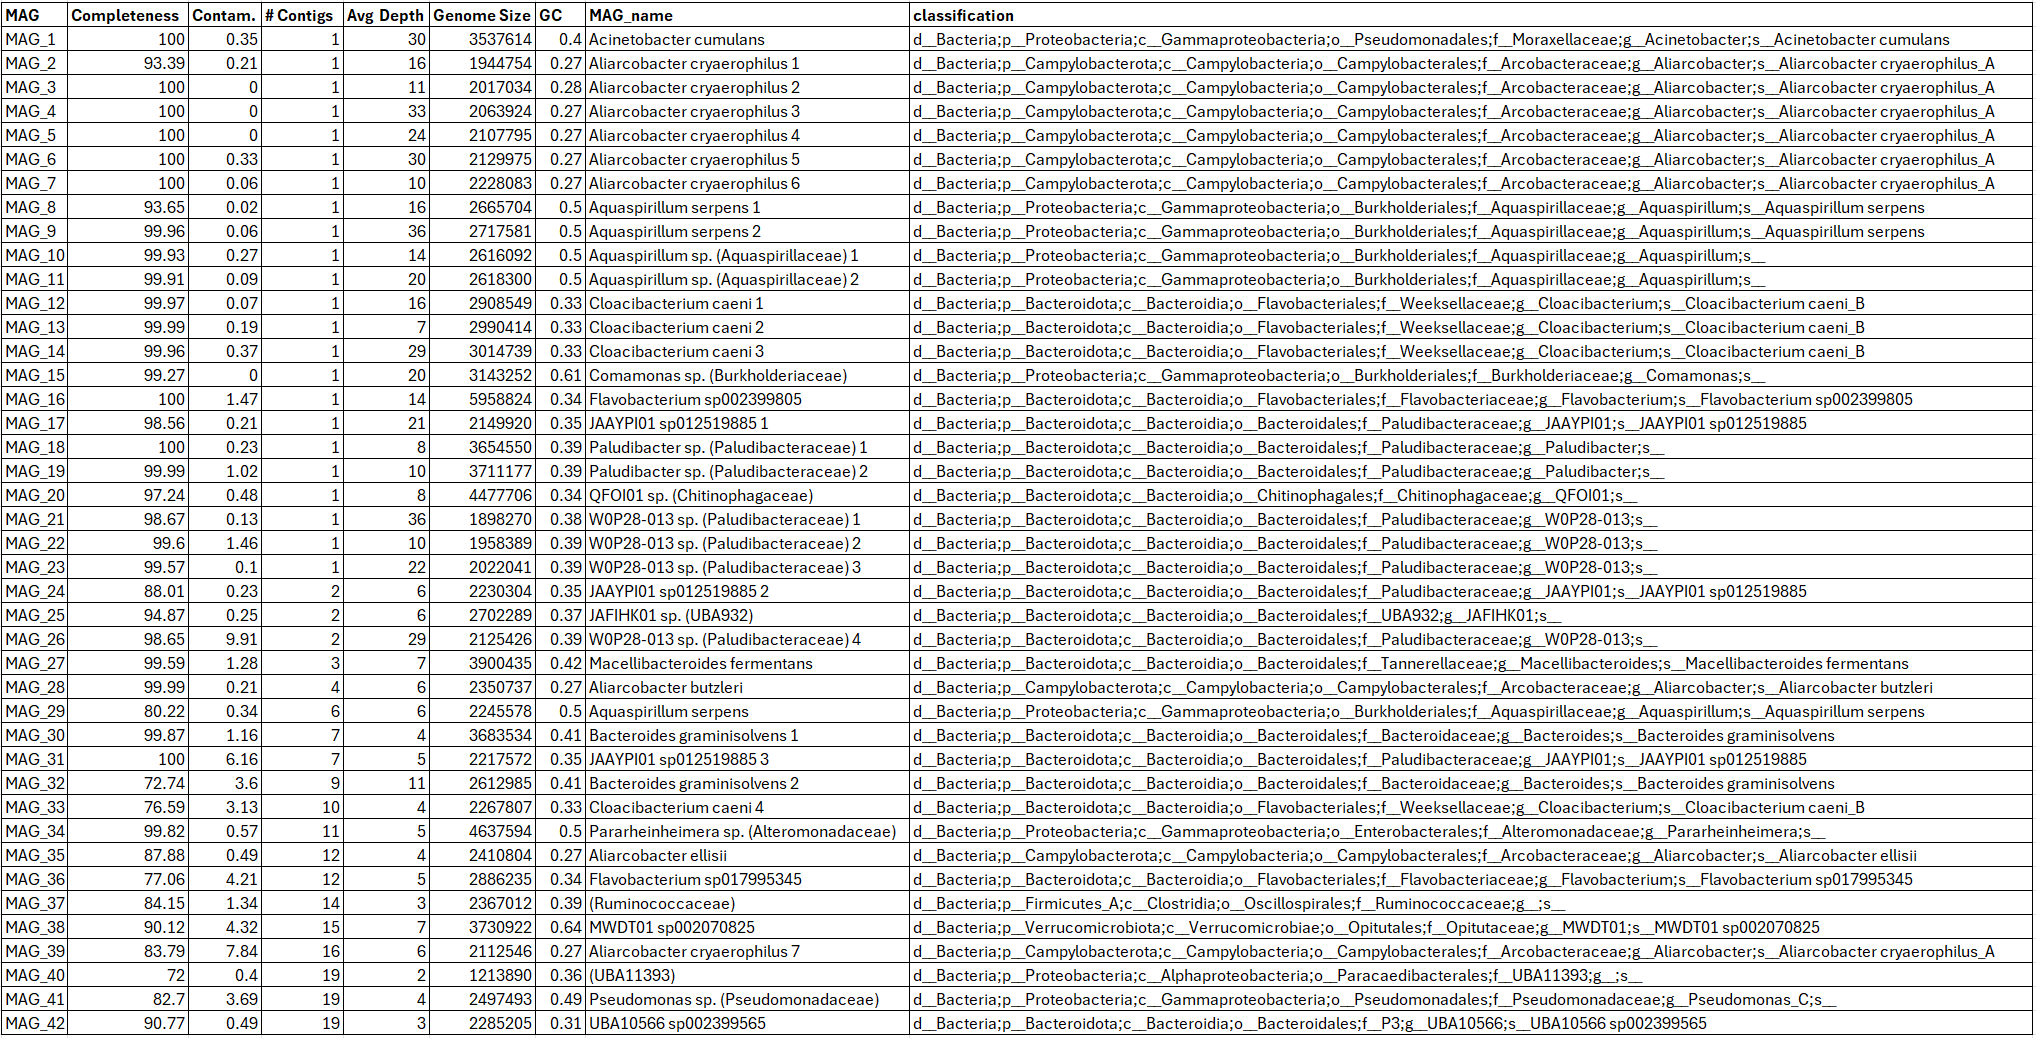


Supplementary Table 3

Table containing information on all of the MAGs generated from long-read sequencing, including completeness, contamination, number of contigs per MAG, cumulative genome size, average depth of coverage per MAG, GC content, and classification based on GTDB-Tk. MAGs are ordered by the number of contigs they contain, from the lowest to the highest number.
